# Supplementary figures and images for: Wnt7b stimulates embryonic lung growth by coordinately increasing the replication of epithelium and mesenchyme
Source: Oxford University Press journal article supplement (doi:10.1242/dev.015495), 2008-03-27

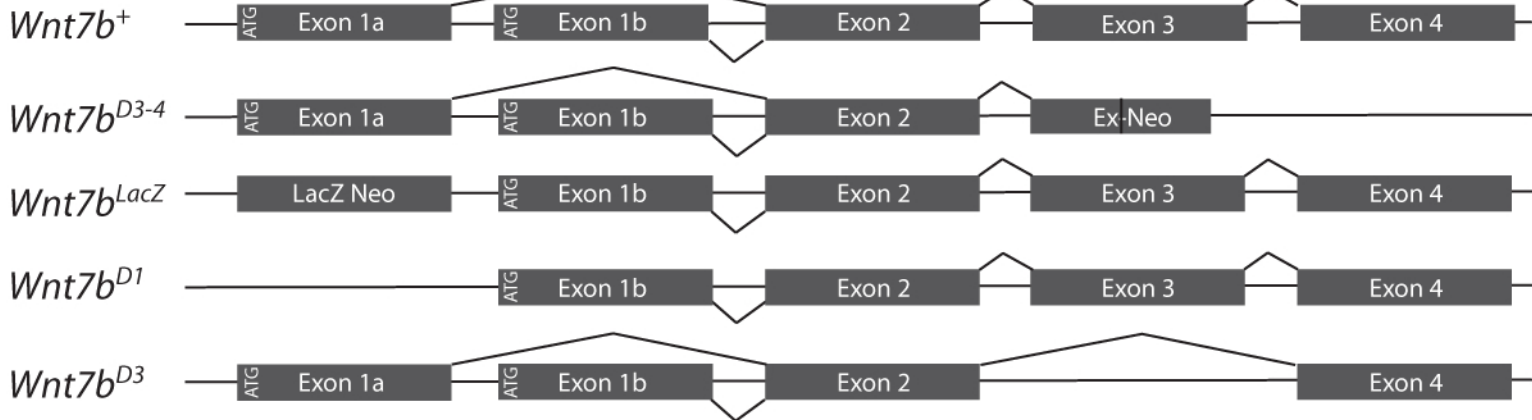

Supplement: dev015495-sup-015495-figs1.pdf [file dev015495-sup-015495-figs1.pdf]

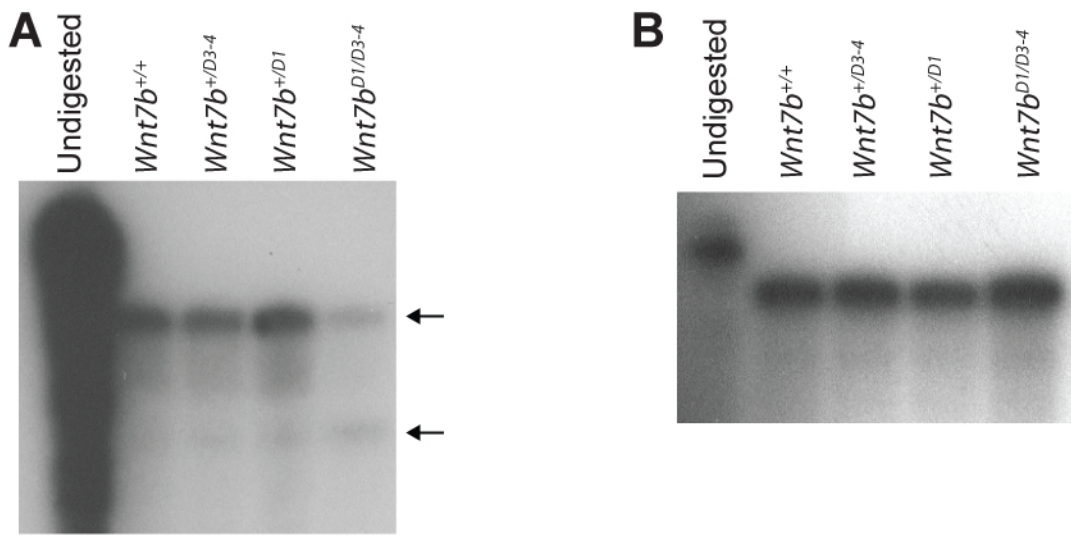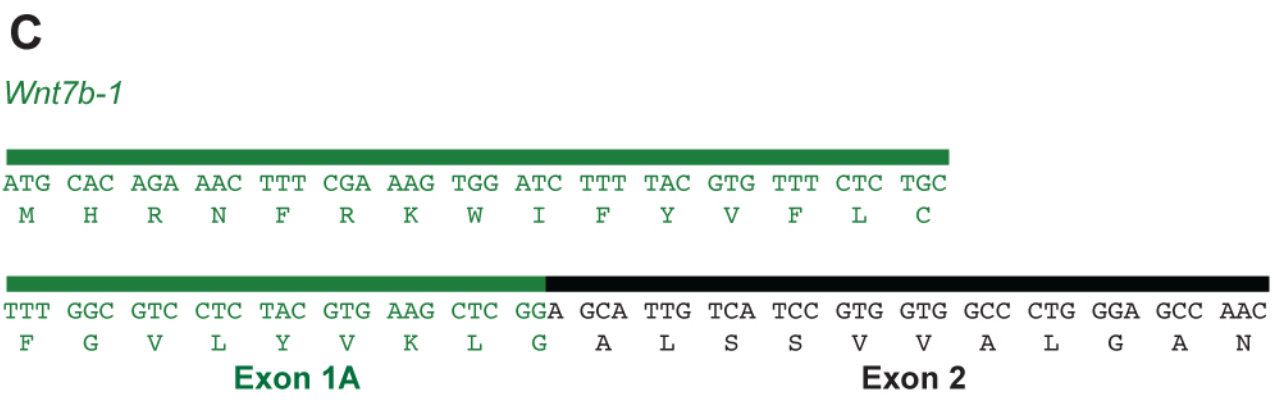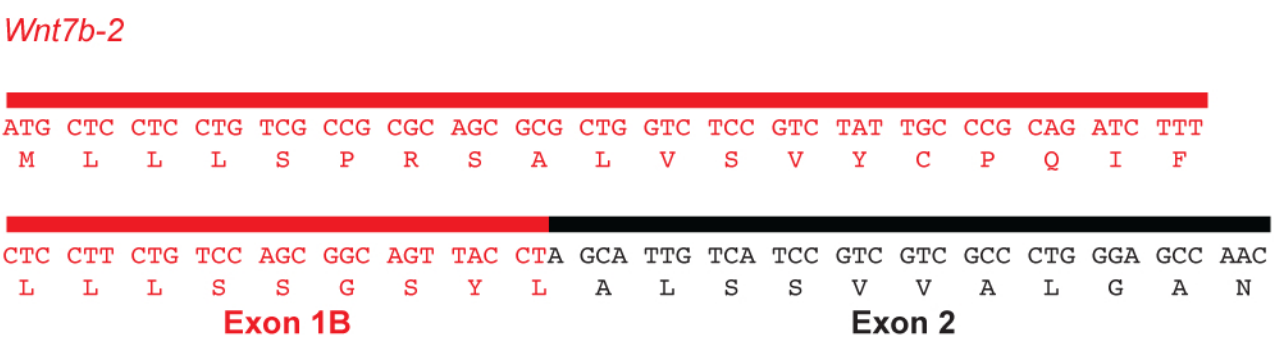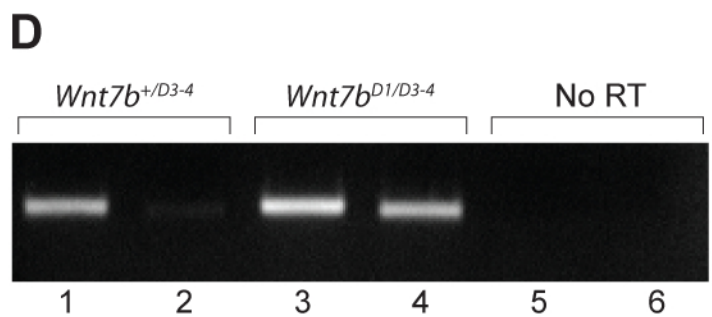

Supplement: dev015495-sup-015495-figs2.pdf [file dev015495-sup-015495-figs2.pdf]

**A**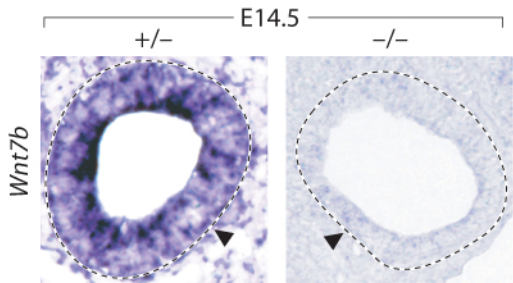**B**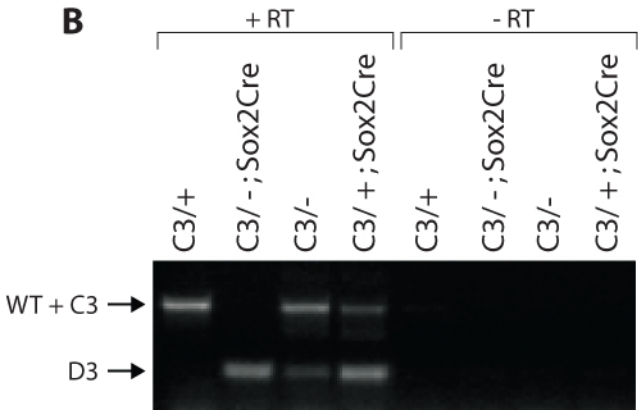

Supplement: dev015495-sup-015495-figs3.pdf [file dev015495-sup-015495-figs3.pdf]

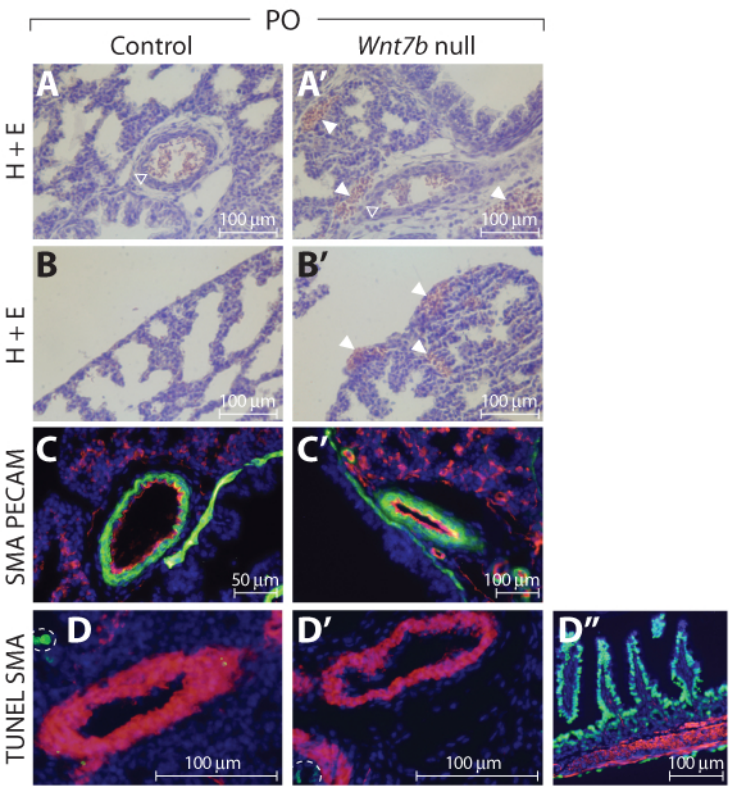

Supplement: dev015495-sup-015495-figs4.pdf [file dev015495-sup-015495-figs4.pdf]

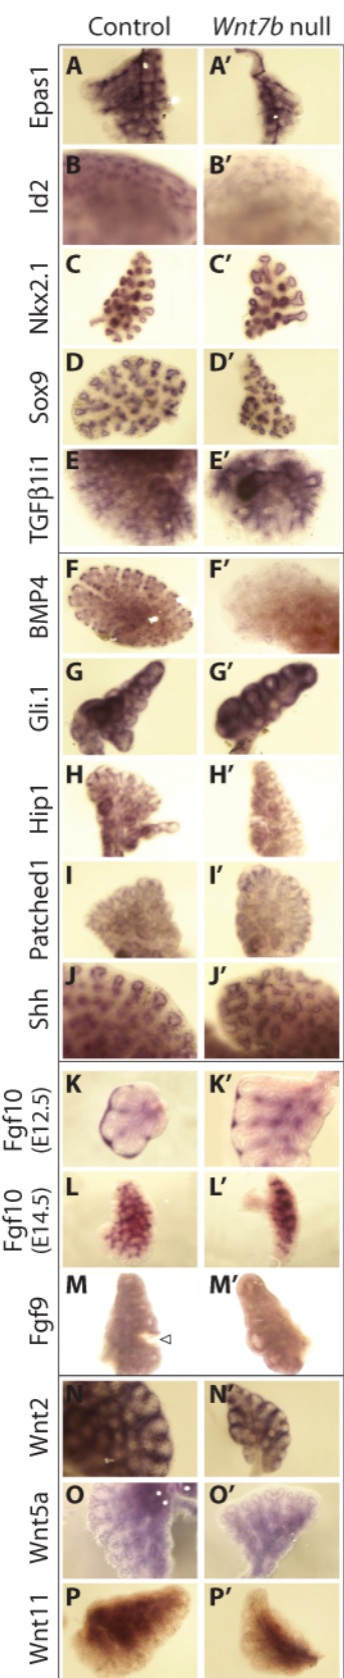

Supplement: dev015495-sup-015495-figs5.pdf [file dev015495-sup-015495-figs5.pdf]
